# Supplementary material
Source: Springer Nature journal article supplement (https://www.springermedizin.de/resource/supplementary/12877_2011_742_MOESM1_ESM.pdf/9440386)
Supplement: MOESM1 [file 9440386]

AgeCoDe Cohort  
Baseline  
N = 3,327

Patients assessed  
in Follow-up 2  
N = 2,412

Patients with valid Social  
Support Score in Follow-up 2  
N = 2,367

Final sample for Endpoint  
Mortality  
N = 2,367

Final sample for Endpoint  
Cognitive Change  
N = 1,869

|                          |     |
|--------------------------|-----|
| <i>Excluded Patients</i> |     |
| age below 75 years       | 39  |
| dementia at baseline     | 70  |
| died                     | 305 |
| other                    | 501 |

|                               |    |
|-------------------------------|----|
| <i>Excluded Patients</i>      |    |
| no valid social support score | 45 |

|                                                     |     |
|-----------------------------------------------------|-----|
| <i>Excluded Patients</i>                            |     |
| died between Follow-up 2<br>and Follow-up 3         | 185 |
| Drop-out for other reasons<br>than death            | 274 |
| no valid SISCO in Follow-up 2<br>and/or Follow-up 3 | 39  |
